# Supplementary material for: Evolutionary dynamics of rRNA gene clusters in cichlid fish
Source: PubMed Central journal article supplement (PMC3503869; doi:10.1186/1471-2148-12-198), 2012-10-05
Supplement: 1471-2148-12-198-S2.pdf [file 1471-2148-12-198-S2.pdf]

**Additional file 2.** Investigated Neotropical cichlids.

| Major groups and species          | Origin of samples                               | 2n | 5S rDNA number and position | Chromosomal arm | Reference       | 45S rDNA number and position | Chromosomal arm | References |
|-----------------------------------|-------------------------------------------------|----|-----------------------------|-----------------|-----------------|------------------------------|-----------------|------------|
| <b>Cichlinae</b>                  |                                                 |    |                             |                 |                 |                              |                 |            |
| <b>Retroculini</b>                |                                                 |    |                             |                 |                 |                              |                 |            |
| <i>Retroculus lapidifer</i>       | Araguaia river, Barra do Garças, MT, Brazil     | 48 | 2t/a(p)                     | L               | This work       | 2t/a(t)                      | S               | [24]       |
| <b>Astronotini</b>                |                                                 |    |                             |                 |                 |                              |                 |            |
| <i>Astronotus ocellatus</i>       | Araguaia river, Barra do Garças, MT, Brazil     | 48 | 2m/sm(t)+2t/a(i)            | 2S+2L           | This work       | 2m/sm(i)                     | S               | [24]       |
| <b>Cichlini</b>                   |                                                 |    |                             |                 |                 |                              |                 |            |
| <i>Cichla piquiti</i>             | Araguaia river, Barra do Garças, MT, Brazil     | 48 | 2t/a(p)                     | L               | This work       |                              |                 |            |
| <i>Cichla kelberi</i>             | Araguaia river, Barra do Garças, MT, Brazil     | 48 | 2t/a(i)                     | L               | This work, [35] | 2t/a(t)                      | L               | [35, 24]   |
| <b>Chaetobranchini</b>            |                                                 |    |                             |                 |                 |                              |                 |            |
| <i>Chaetobranchius flavescens</i> | Araguaia river, Barra do Garças, MT, Brazil     | 48 | 2t/a(i)                     | L               | This work       | 2m/sm(i)                     | S               | [24]       |
| <b>Geophagini</b>                 |                                                 |    |                             |                 |                 |                              |                 |            |
| <i>Geophagus brasiliensis</i>     | Araguaia river, Barra do Garças, MT, Brazil     | 48 | 2t/a(i)                     | L               | This work, [27] | 2t/a(t)                      | S               | [27]       |
| <i>Geophagus proximus</i>         | Araguaia river, Barra do Garças, MT, Brazil     | 48 | 2t/a(i)                     | L               | This work       |                              |                 |            |
| <i>Geophagus surinamensis</i>     | Orinoco river, Caicara, Venezuela               | 48 | 2t/a(i)                     | L               | This work       |                              |                 |            |
| <i>Bitodoma cupido</i>            | Araguaia river, Barra do Garças, MT, Brazil     | 48 | 2t/a(i)                     | L               | This work       | 2m/sm(t)                     | S               | [24]       |
| <i>Crenicichla lepidota</i>       | São Gonçalo stream and Polegar lake, RS, Brazil | 48 | 4t/a(i)                     | L               | [30]            | 2m/sm(i)                     | S               | [30]       |
| <i>Satanoperca jurupari</i>       | Araguaia river, Barra do Garças, MT, Brazil     | 48 | 2t/a(i)                     | L               | This work       | 2t/a(t)                      | S               | [24]       |
| <b>Cichlasomatini</b>             |                                                 |    |                             |                 |                 |                              |                 |            |
| <i>Aequidens tetramerus</i>       | Araguaia river, Barra do Garças, MT, Brazil     | 48 | 4t/a(i)                     | L               | This work       | 2t/a(t)                      | S               | [24]       |
| <i>Aequidens plagiozonatus</i>    | Araguaia river, Barra do Garças, MT, Brazil     | 48 | 2t/a(i)                     | L               | This work       |                              |                 |            |

|                                                |                                             |    |                          |         |           |                                               |             |      |
|------------------------------------------------|---------------------------------------------|----|--------------------------|---------|-----------|-----------------------------------------------|-------------|------|
| <i>Cichlasoma facetum</i>                      | Tarumã river, Ponta Grossa, PR, Brasil      | 48 | 2t/a(i)                  | L       | [27]      | 2t/a(t)                                       | S           | [27] |
| <i>Cichlasoma nigrofasciatum</i>               | Araguaia river, Barra do Garças, MT, Brazil | 48 | 2t/a(i)                  | L       | This work |                                               |             |      |
| <i>Cichlasoma paranaense</i>                   | Carrapato stream, Penápolis, SP, Brazil     | 48 | 2t/a(i)                  | L       | This work |                                               |             |      |
| <i>Laetacara dorsigera</i>                     | Araguaia river, Barra do Garças, MT, Brazil | 44 | 2t/a(p)+2t/a(i)+10t/a(p) | 2L+12CC | This work | 2t/a(t)                                       | S           | [24] |
| <b>Heroini</b>                                 |                                             |    |                          |         |           |                                               |             |      |
| <i>Heros efasciatus</i>                        | Araguaia river, Barra do Garças, MT, Brazil | 48 | 2t/a(i)                  | L       | This work | 2t/a(t)                                       | S           | [24] |
| <i>Mesonauta festivus</i>                      | Araguaia river, Barra do Garças, MT, Brazil | 48 | 2t/a(i)                  | L       | This work | 6t/a(t)                                       | S           | [24] |
| <i>Pterophyllum scalare</i>                    | Araguaia river, Barra do Garças, MT, Brazil | 48 | 2t/a(i)                  | L       | This work | 2m/sm(t)                                      | S           | [24] |
| <i>Symphysodon aequifasciatus</i> <sup>#</sup> | Tefê river, AM, Brazil                      | 60 | 2m/sm(t)                 | S       | [28]      | 2m/sm(t); 3m/sm(t)                            | S           | [28] |
| <i>Symphysodon discus</i> <sup>#</sup>         | Negro river, AM, Brazil                     | 60 | 2m/sm(t)                 | S       | [28]      | 2m/sm(t); 3m/sm(t); 4m/sm(t); 5m/sm(t)        | S           | [28] |
| <i>Symphysodon haraldi</i> <sup>#</sup>        | Manacapuru river, AM, Brazil                | 60 | 2m/sm(t)                 | S       | [28]      | 2m/sm(t); 2m/sm(t)+1t/a(i); 2m/sm(t)+1m/sm(i) | S; 2S+1L; S | [28] |

2n, diploid number; t/a, telo/acrocentric; m/sm, meta/submetacentric; L, long arm; S, short arm; CC, closely associated to centromeric region; (p), proximal; (i), interstitial; (t), terminal. The (#) indicates species with polymorphism for 45S rDNA. The polymorphic conditions are separated by (;).
