# Supplementary material for: Evolutionary dynamics of rRNA gene clusters in cichlid fish
Source: PubMed Central journal article supplement (PMC3503869; doi:10.1186/1471-2148-12-198), 2012-10-05
Supplement: 1471-2148-12-198-S3.pdf [file 1471-2148-12-198-S3.pdf]

**Additional file 3:** Number of 5S and 18S rRNA gene copies retrieved from the *Oreochromis niloticus* genome database at the BouillaBase (<http://cichlid.umd.edu/cichlidlabs/kocherlab/bouillabase.html>).

| <b>Scaffold</b> | <b>Number of 5S<br/>rRNA gene copies</b> | <b>Scaffold</b> | <b>Number of 18S<br/>rRNA gene copies</b> |
|-----------------|------------------------------------------|-----------------|-------------------------------------------|
| Scaffold_0      | 1                                        | Scaffold_1      | 2                                         |
| Scaffold_3      | 1                                        | Scaffold_6      | 1                                         |
| Scaffold_4      | 1                                        | Scaffold_8      | 1                                         |
| Scaffold_6      | 3                                        | Scaffold_13     | 4                                         |
| Scaffold_7      | 2                                        | Scaffold_19     | 3                                         |
| Scaffold_9      | 1                                        | Scaffold_38     | 1                                         |
| Scaffold_14     | 1                                        | Scaffold_40     | 1                                         |
| Scaffold_22     | 1                                        | Scaffold_44     | 1                                         |
| Scaffold_26     | 1                                        | Scaffold_58     | 1                                         |
| Scaffold_54     | 1                                        | Scaffold_61     | 1                                         |
| Scaffold_55     | 2                                        | Scaffold_86     | 1                                         |
| Scaffold_66     | 1                                        | Scaffold_104    | 1                                         |
| Scaffold_69     | 1                                        | Scaffold_114    | 1                                         |
| Scaffold_83     | 1                                        | Scaffold_118    | 1                                         |
| Scaffold_90     | 1                                        | Scaffold_136    | 1                                         |
| Scaffold_101    | 1                                        | Scaffold_143    | 1                                         |
| Scaffold_116    | 1                                        | Scaffold_169    | 1                                         |
| Scaffold_117    | 1                                        | Scaffold_173    | 1                                         |
| Scaffold_148    | 1                                        | Scaffold_181    | 1                                         |
| Scaffold_164    | 4                                        | Scaffold_182    | 1                                         |
| Scaffold_191    | 9                                        | Scaffold_185    | 1                                         |
| Scaffold_219    | 1                                        | Scaffold_197    | 1                                         |
| Scaffold_237    | 1                                        | Scaffold_201    | 1                                         |
| Scaffold_253    | 1                                        | Scaffold_214    | 1                                         |
| Scaffold_261    | 1                                        | Scaffold_245    | 1                                         |
| Scaffold_263    | 1                                        | Scaffold_250    | 1                                         |
| Scaffold_286    | 1                                        | Scaffold_515    | 1                                         |
| Scaffold_328    | 1                                        | Scaffold_516    | 2                                         |
| Scaffold_397    | 1                                        | Scaffold_834    | 1                                         |
| Scaffold_408    | 1                                        | Scaffold_1005   | 1                                         |
| Scaffold_512    | 1                                        | Scaffold_1544   | 1                                         |
| Scaffold_536    | 1                                        | <b>total</b>    | <b>38</b>                                 |
| Scaffold_624    | 1                                        |                 |                                           |
| Scaffold_677    | 2                                        |                 |                                           |
| Scaffold_688    | 1                                        |                 |                                           |
| Scaffold_768    | 3                                        |                 |                                           |
| Scaffold_791    | 1                                        |                 |                                           |
| Scaffold_813    | 2                                        |                 |                                           |
| Scaffold_1031   | 1                                        |                 |                                           |
| Scaffold_1299   | 1                                        |                 |                                           |
| Scaffold_1430   | 1                                        |                 |                                           |
| Scaffold_1626   | 1                                        |                 |                                           |
| <b>total</b>    | <b>59</b>                                |                 |                                           |
