# Supplementary material for: Evolutionary dynamics of rRNA gene clusters in cichlid fish
Source: PubMed Central journal article supplement (PMC3503869; doi:10.1186/1471-2148-12-198), 2012-10-05

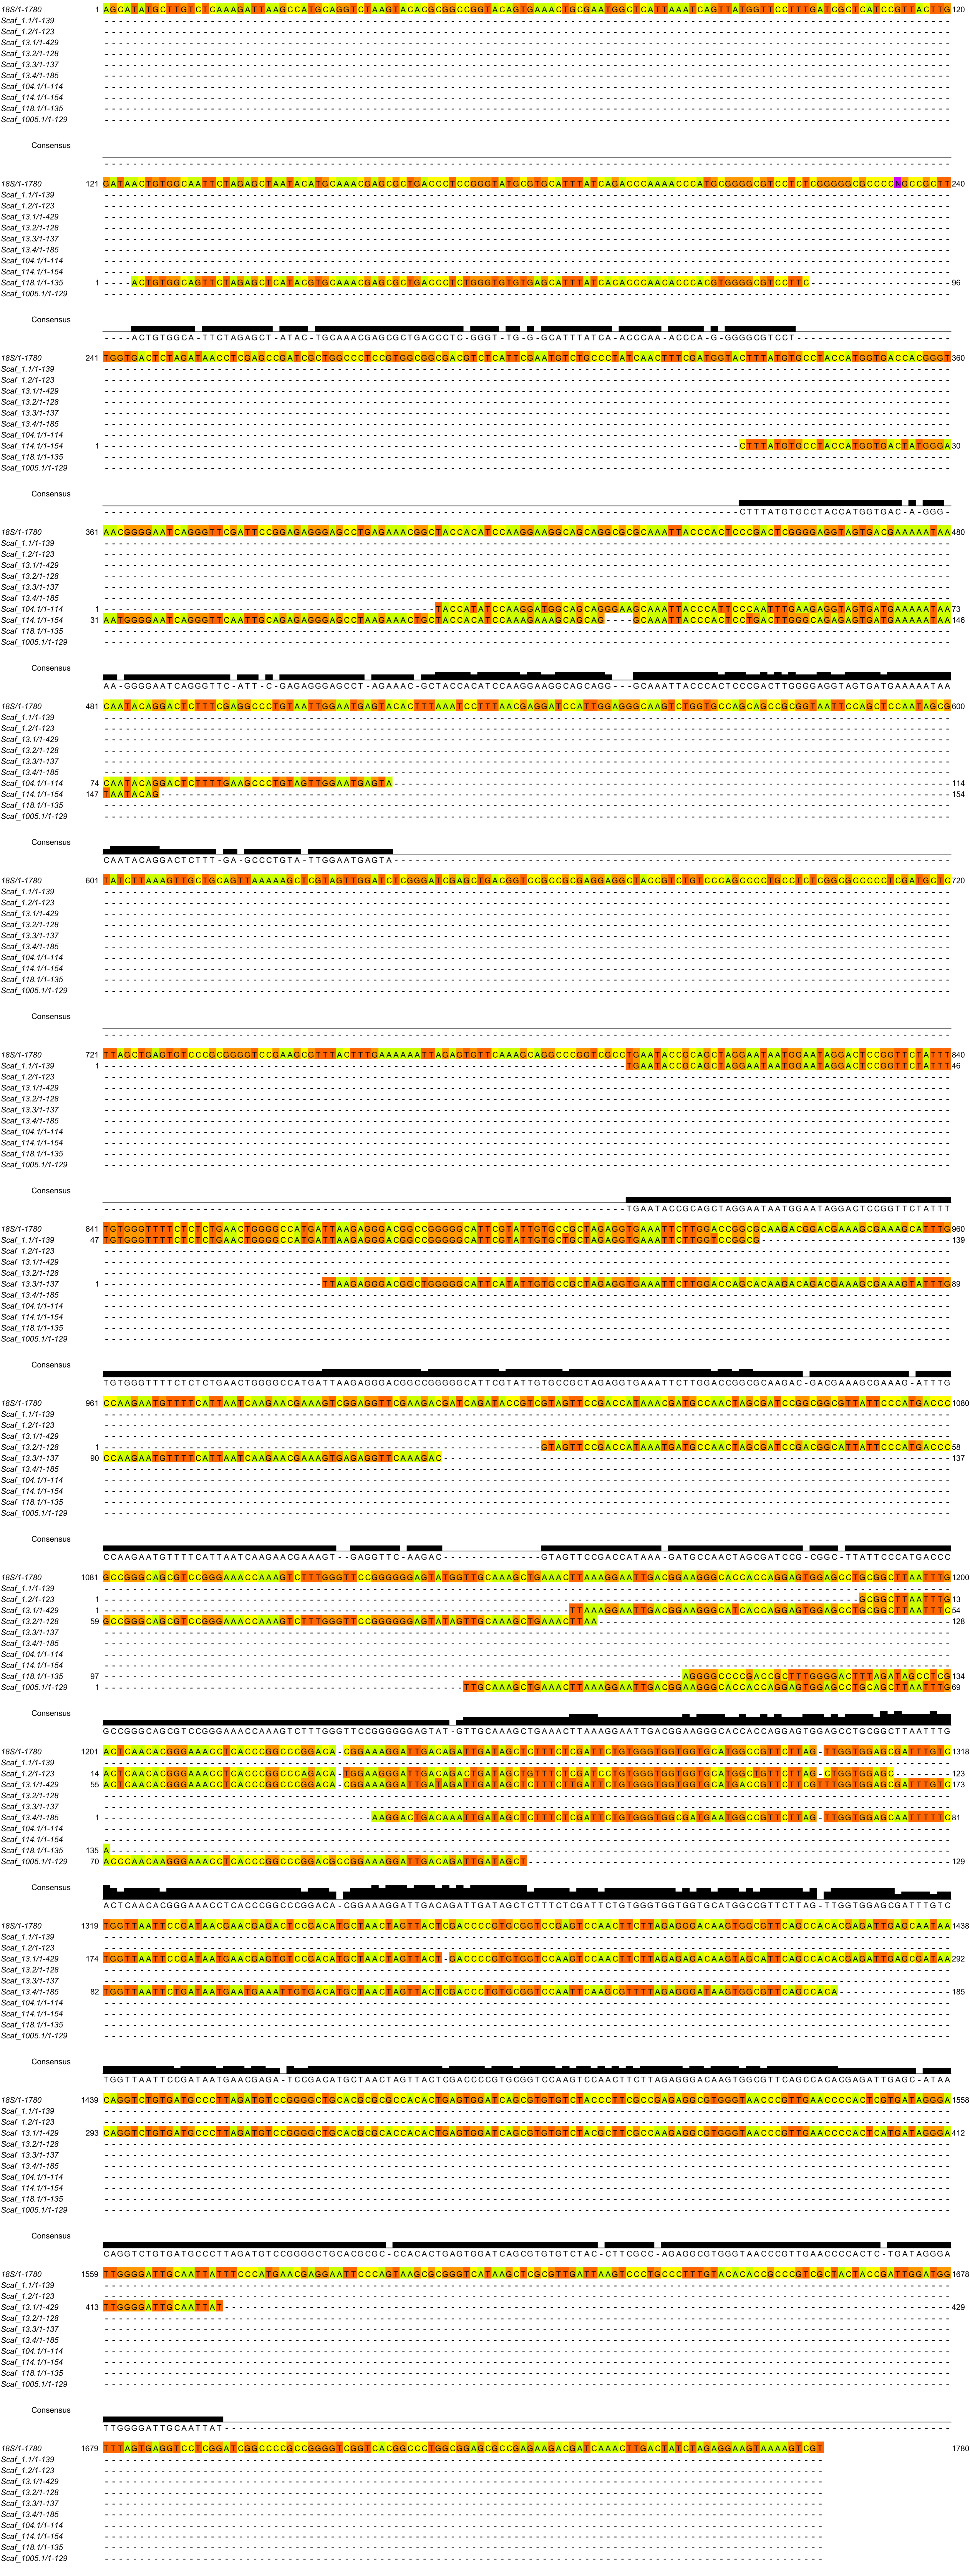

Supplement: 1471-2148-12-198-S4.pdf [file 1471-2148-12-198-S4.pdf]
