# Supplementary material for: Evolutionary dynamics of rRNA gene clusters in cichlid fish
Source: PubMed Central journal article supplement (PMC3503869; doi:10.1186/1471-2148-12-198), 2012-10-05
Supplement: 1471-2148-12-198-S5.pdf [file 1471-2148-12-198-S5.pdf]

**Additional file 5:** Alignment of the 5S rRNA gene copies retrieved from the *Oreochromis niloticus* genome at the BouillaBase database (<http://cichlid.umd.edu/cichlidlabs/kocherlab/bouillabase.html>). The nucleotides are identified by different colors, and the black blocks under the alignment indicate the consensus sequence.

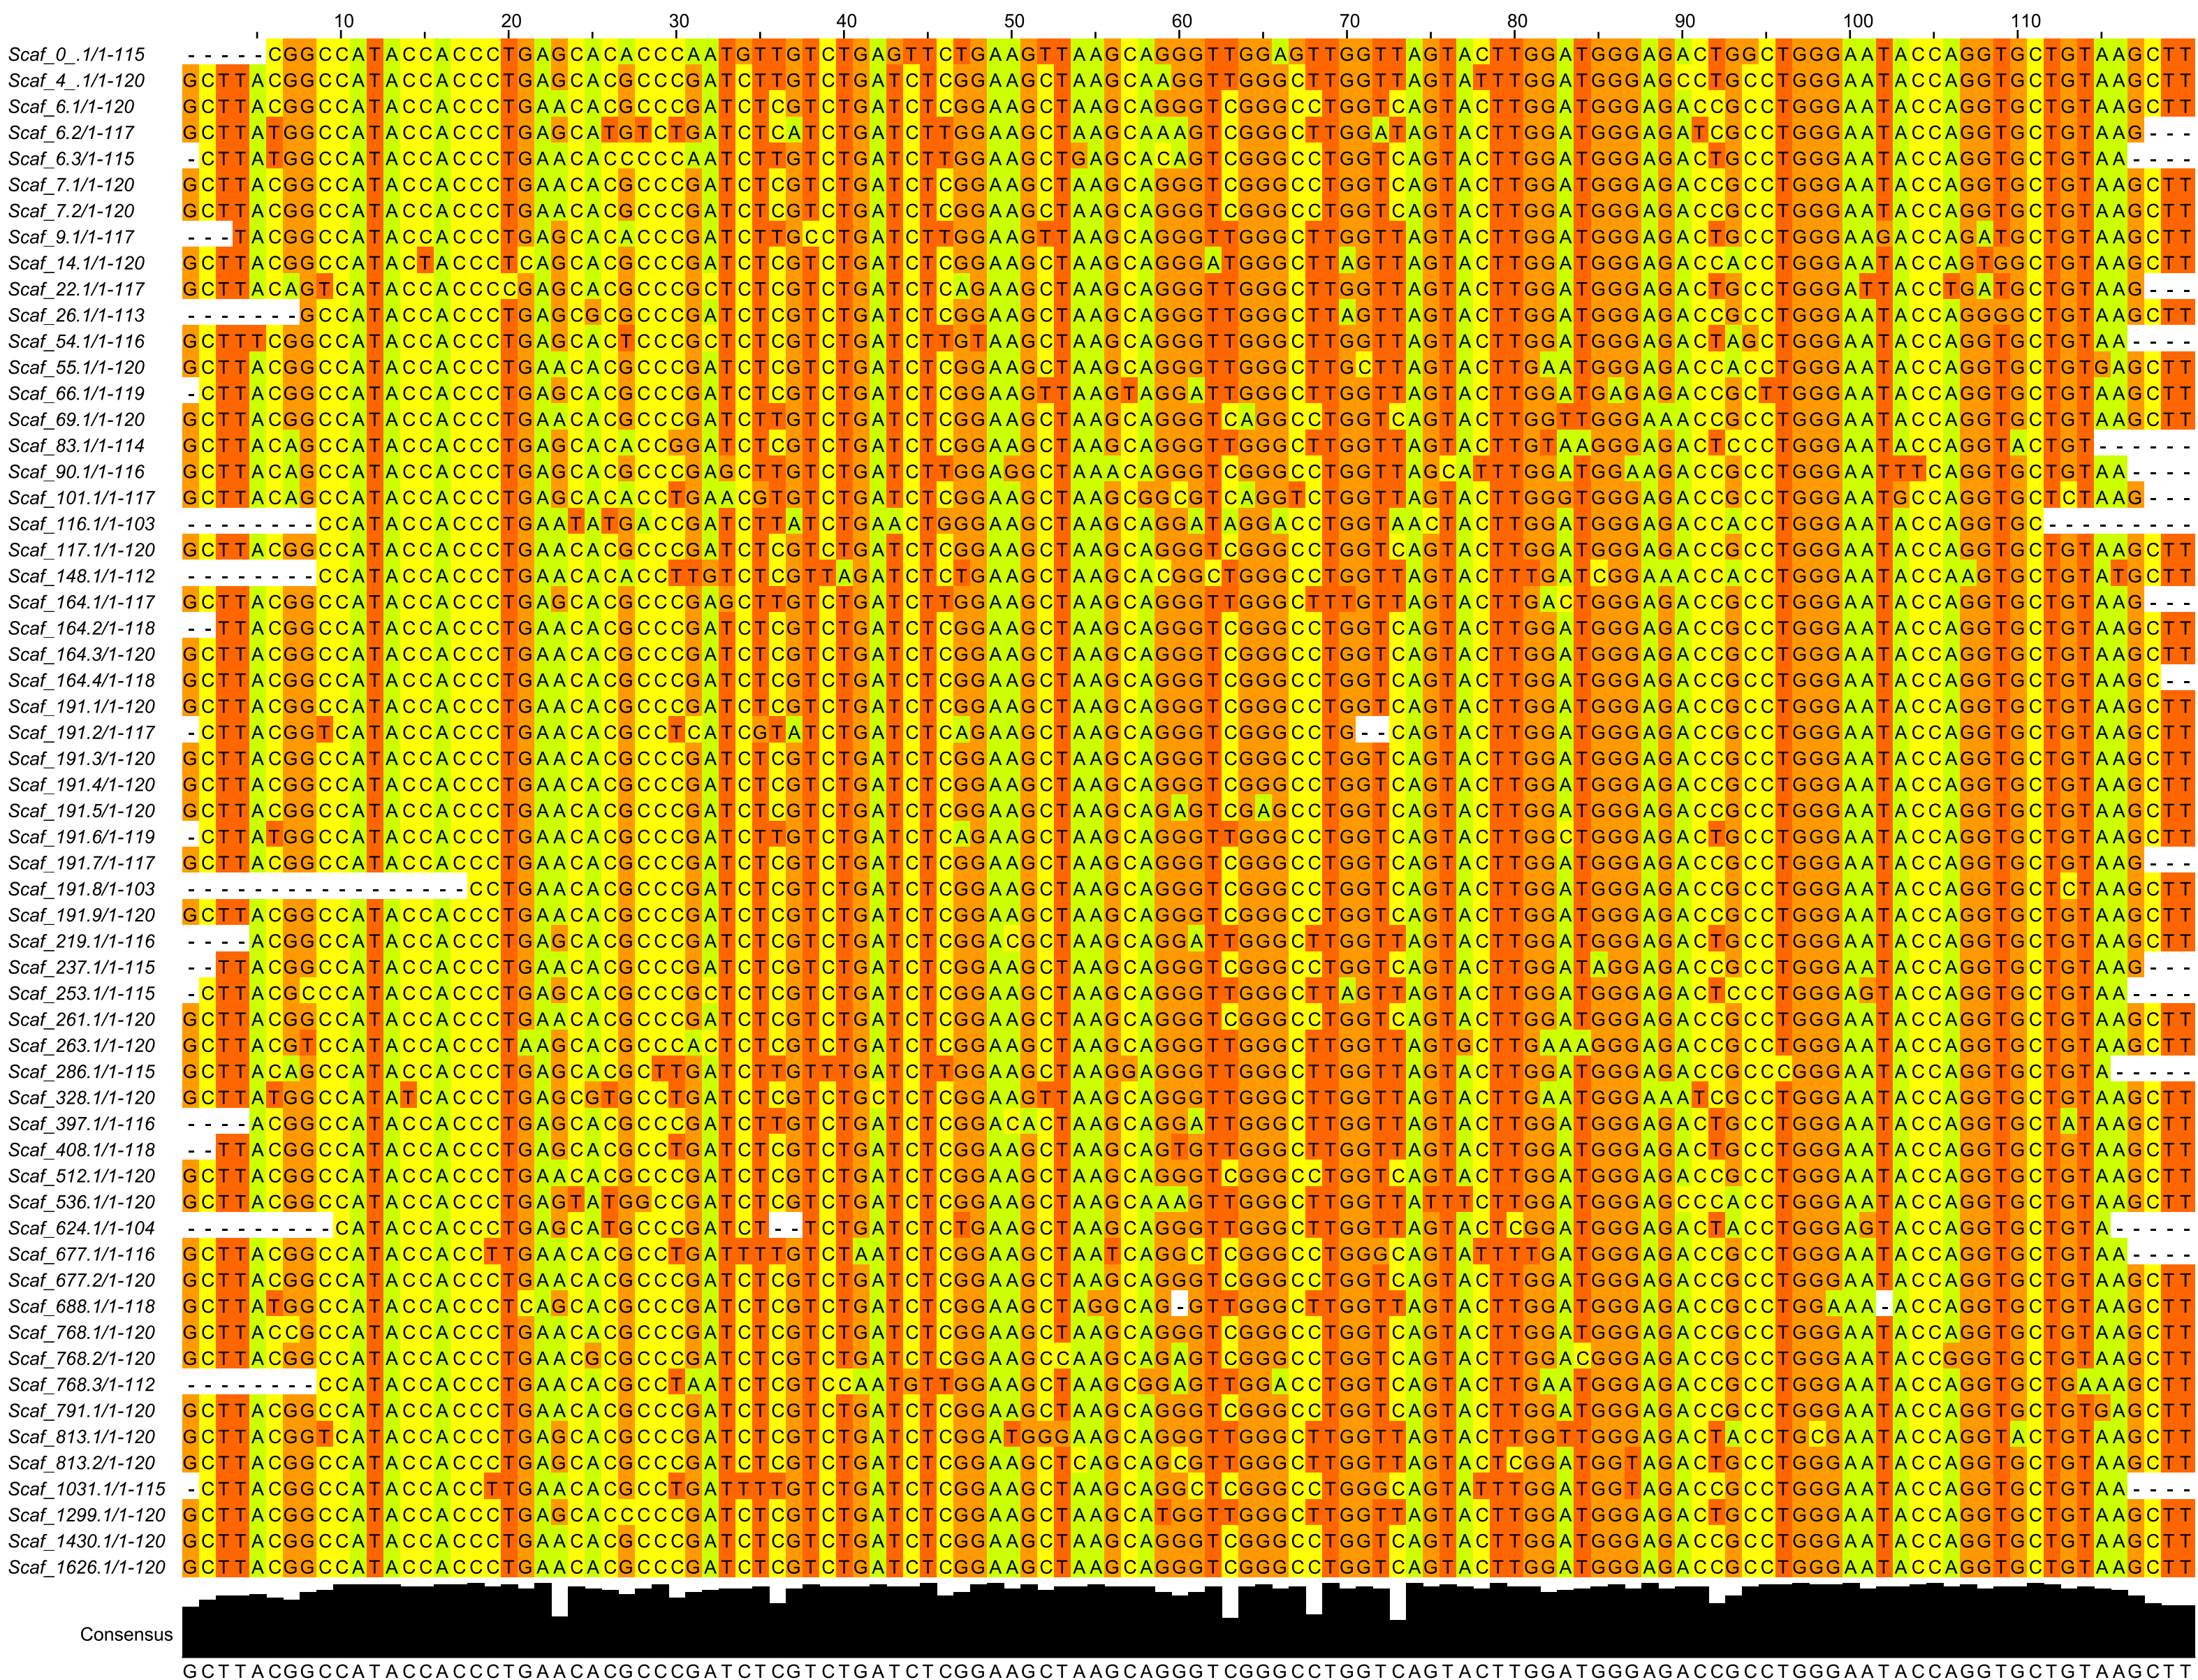

Consensus

GCTTACGGCCATACCACCTGAACACGCCCGATCTCGTCTGATCTCGGAAGCTAAGCAGGGTCGGGCCTGGTCAGTACTTGGATGGGAGACCGCCTGGGAATACCAGGTGCTGTAAGCTT
