# Supplementary material for: Evolutionary dynamics of rRNA gene clusters in cichlid fish
Source: PubMed Central journal article supplement (PMC3503869; doi:10.1186/1471-2148-12-198), 2012-10-05
Supplement: 1471-2148-12-198-S6.pdf [file 1471-2148-12-198-S6.pdf]

**Additional file 6:** Identified transposable elements (TEs) in the flanking regions (FRs) of 5S rRNA gene copies retrieved from the *O. niloticus* genome and their similarity (%) level to sequences deposited in Repbase. d1, d2..., u1, u2... indicate the different copies detected. The position of the TE is indicated by “d” - downstream of the gene or “u” - upstream of the gene. R indicates reverse copies of the TE.

| <b>Scaffolds</b> | <b>FRs</b> | <b>TEs</b>                | <b>Similarity (%)</b> |
|------------------|------------|---------------------------|-----------------------|
| Scaf_0           | d (R)      | SINE2-1_AFC               | 0.7982                |
|                  | u (R)      | -                         | -                     |
| Scaf_4           | d          | L2-41 DRe                 | 0.7022                |
|                  | u          | SINE2-1 AFC<br>MuDr-2x_AP | 0.8513<br>0.8525      |
| Scaf_6           | d.1 (R)    | -                         | -                     |
|                  | u.1 (R)    | LINE2CI_CE                | 0.8367                |
|                  | d.2        | PIVE                      | 0.7595                |
|                  | u.2        | SINE2-1 AFC               | 0.8655                |
|                  |            | Copia-53 MLP-I            | 0.7711                |
|                  | d.3        | -                         | -                     |
| u.3              | -          | -                         |                       |
| Scaf_7           | d.1        | MUDRAVI2                  | 0.7500                |
|                  |            | Kolobok-15_HM             | 0.8333                |
|                  | u.1        | -                         | -                     |
|                  | d.2 (R)    | DNA_TTAA0-7-DR            | 0.7014                |
|                  |            | DNA -8-24 DR              | 0.7015                |
|                  |            | DNA -8-24 DR              | 0.7222                |
|                  |            | hAT-N21_DR                | 0.7969                |
| Scaf_9           | d          | -                         | -                     |
|                  | u          | CR1-29_DR<br>RNERVK23     | 0.8627<br>0.7288      |
| Scaf_14          | d          | MAUI                      | 0.7411                |
|                  |            | Tc1-1_ACar                | 0.9355                |
|                  |            | Mariner-2_DYa             | 0.7054                |
| Scaf_22          | u          | SINE2-1 AFC               | 0.8626                |
|                  | d          | AeTango2                  | 0.7547                |
|                  |            | SINE2-1 AFC               | 0.8313                |
| Scaf_26          | d          | SINE2-1 AFC               | 0.8679                |
|                  |            | MAUI                      | 0.7317                |
|                  |            | DNA-4-5 DR                | 0.8222                |
|                  |            | CR1-1 DAn                 | 0.7363                |
| Scaf_54          | d (R)      | SINE2-1 AFC               | 0.8503                |
|                  |            | Gypsy-22_SB-I             | 0.7719                |
|                  |            | RTE-1 TD                  | 0.7573                |
|                  |            | RTE-2 AFC                 | 0.7967                |

|          |         |                |        |
|----------|---------|----------------|--------|
|          |         | RTE-2 AFC      | 0.7861 |
|          |         | TC1 DR3        | 0.8457 |
|          |         | TC1 DR3        | 0.8077 |
|          |         | SMAR 12        | 0.9268 |
|          | u (R)   | SINE2-1 AFC    | 0.8699 |
|          |         | SMAR 12        | 0.8307 |
| Scaf_55  | d (R)   | SINE2-1 AFC    | 0.8642 |
|          | u (R)   | -              | -      |
| Scaf_66  | d (R)   | SINE2-1 AFC    | 0.8519 |
|          | u (R)   | MuDR-PGr       | 0.7170 |
|          |         | Rex5           | 0.8136 |
|          |         | RSINE2         | 0.9355 |
| Scaf_69  | d       | CR1-25_HM      | 0.7778 |
|          |         | TE-X-4_DR      | 0.7174 |
|          |         | 5S_CPo         | 0.9796 |
|          | u       | TC1 DR3        | 0.8438 |
|          |         | TC1DR3         | 0.8039 |
| Scaf_83  | d       | -              | -      |
|          | u       | SINE_FR2       | 0.8045 |
| Scaf_90  | d       | Tc1-1 PM       | 0.7057 |
|          | u       | SINE2-1 AFC    | 0.8955 |
|          |         | Tc1-3 Xt       | 0.7000 |
|          |         | hAT-1 NV       | 0.7041 |
| Scaf_101 | u       | MYSERV16_I     | 0.7778 |
|          | d       | REX1-7_XT      | 0.8000 |
|          |         | CER15-1-I_CE   | 0.8333 |
| Scaf_116 | d(R)    | REP522         | 0.7321 |
|          |         | SINE2-1 AFC    | 0.8230 |
|          | u(R)    | SINE2-1 AFC    | 0.8134 |
|          |         | EnSpm2 TM      | 0.7474 |
| Scaf_117 | d       | Gypsy-39       | 0.8043 |
|          | u       | Polinton-2_HM  | 0.7442 |
| Scaf_148 | d       | Tc1-7 DR       | 0.7273 |
|          |         | Tc1-FR3        | 0.8116 |
|          | u       | SINE2-1 AFC    | 0.8346 |
|          |         | Tc1-9 Xt       | 0.7411 |
| Scaf_164 | d.1 (R) | Copia 18-PTR_I | 0.9310 |
|          |         | EnSpm-3-HV     | 0.7759 |
|          |         | SINE2-1 AFC    | 0.8185 |
|          | u.1 (R) | hATm-1_CS      | 0.8571 |
|          | d.2(R)  | EnSpm-13-SBi   | 0.8537 |
|          |         | Ginger2-1 NV   | 0.7612 |
|          |         | Helitron-2 DR  | 0.7099 |
|          | u.2(R)  | 5S_CPo         | 0.7900 |
|          |         | Meg_PVa        | 0.8393 |
|          | d.3 (R) | 5S_CPo         | 0.7900 |

|          |         |               |        |
|----------|---------|---------------|--------|
|          |         | Meg_PVa       | 0.8393 |
|          |         | Polinton-2_CB | 0.7600 |
|          | u.3 (R) | 5S_CPo        | 0.9576 |
|          |         | Meg_PVa       | 0.7463 |
|          | d.4     | Meg_PVa       | 0.8393 |
|          |         | Polinton-2_CB | 0.7600 |
|          |         | 5S_CPo        | 0.9661 |
|          | u.4     | Meg_PVa       | 0.7463 |
|          |         | DNA-3-5_DR    | 0.7679 |
| Scaf_191 | d.1     | Daphne-18_HM  | 0.7500 |
|          | u.1     | L1-23_ACar    | 0.7869 |
|          | d.2     | hAT-1_SM      | 0.8077 |
|          | u.2     | -             | -      |
|          | d.4 (R) | -             | -      |
|          | u.4 (R) | HARB-N1_STu   | 0.9062 |
|          | d.5     | DNA-8-5_DR    | 0.8600 |
|          | u.5     | Tc1-10 Xt     | 0.9704 |
|          | d.6     | -             | -      |
|          | u.6     | hAT-N74_DR    | 0.7952 |
|          |         | CHAPLIN5_FR   | 0.7800 |
|          | d.7     | MuDR-11n_VV   | 0.8269 |
|          | u.7     | Sola2-3_DPu   | 0.7526 |
|          |         | CR1-8_CQ      | 0.7869 |
|          |         | MuDR-7_Mad    | 0.7761 |
|          |         | hAT-N23_DR    | 0.7281 |
| Scaf_219 | d       | -             | -      |
|          | u       | SINE2-1 AFC   | 0.8375 |
| Scaf_237 | d       | hAT-N74_DR    | 0.8000 |
|          |         | SMAR 12       | 0.7692 |
|          | u       | hATx-3 SM     | 0.7935 |
|          |         | LTR16-Pca     | 0.7895 |
| Scaf_253 | d       | -             | -      |
|          | u       | SINE2-1 AFC   | 0.8534 |
|          |         | hAT-N26-DR    | 0.7872 |
| Scaf_261 | d       | MEG-RS        | 0.8333 |
|          | u       | -             | -      |
| Scaf_263 | d       | Gypsy-33_GA-I | 0.7826 |
|          |         | Gypsy-33_GA-I | 0.7395 |
|          |         | MAUI          | 0.7500 |
|          | u       | Expander      | 0.7638 |
|          |         | Expander      | 0.7819 |
| Scaf_286 | d       | DNA-6-N7_DR   | 0.7039 |
|          |         | DNA-6-N7_DR   | 0.7526 |
|          |         | COP20_I_MT    | 0.8246 |
|          | u       | SINE2-1 AFC   | 0.8413 |
|          |         | EnSpm2-TM     | 0.7426 |

|           |         |                 |        |
|-----------|---------|-----------------|--------|
| Scaf_328  | d       | HERV17          | 0.7290 |
|           | u       | SINE2-1_AFC     | 0.8710 |
| Scaf_397  |         | MAUI            | 0.7188 |
|           | d       | TC1_FR3         | 0.7206 |
|           | u       | SINE2-1_AFC     | 0.8452 |
| Scaf_408  |         | Gypsy-256_AA-I  | 0.7660 |
|           | d       | SINE2-1_AFC     | 0.8375 |
|           | u       | SINE_TE         | 0.8804 |
| Scaf_512  |         | SINE_AFC        | 0.8991 |
|           | d       | Helitron-2_HM   | 0.7887 |
|           | u       | MuDR-6_STu      | 0.7750 |
| Scaf_536  |         | TAG2            | 0.7674 |
|           | d (R)   | CRI-3_FR        | 0.7211 |
|           |         | DNA8-9_CQ       | 0.8197 |
| Scaf_624  | u (R)   | Gypsy-24-LTR_SP | 0.8837 |
|           | d (R)   | Mariner-8_Dan   | 0.8226 |
|           |         | Rex1-7_XT       | 0.7350 |
|           |         | SINE2-1_AFC     | 0.8492 |
|           | u (R)   | REX1-2_XT       | 0.7200 |
|           |         | piggyBack-N2_XT | 0.8372 |
| Scaf_677  | d.2     | Gypsy-8_Dan-I   | 0.9062 |
|           | u.2     | Tc1-11Xt        | 0.7857 |
| Scaf_688  |         | -               | -      |
|           | d (R)   | L2-1_DR         | 0.8919 |
|           |         | MAUI            | 0.7849 |
|           | u (R)   | Tc1-10ry        | 0.7297 |
|           |         | Tc1-1_PM        | 0.7593 |
|           |         | Penelope-1_AFC  | 0.9084 |
| Scaf_768  | d.3 (R) | SINE_AFC        | 0.9127 |
|           |         | LTR125_MD       | 0.8367 |
| Scaf_791  | u.3 (R) | TE-X-4_DR       | 0.8889 |
|           | d       | ENSPM-6_DR      | 0.8857 |
|           |         | CHAPLIN-4_FR    | 0.7467 |
|           | u       | CR1-29_DR       | 0.8393 |
|           |         | LTR112b_MD      | 0.8611 |
|           |         | L1-13_DR        | 0.7351 |
|           |         | RTE-2_AFC       | 0.8272 |
|           |         | DNA-8-14_DR     | 0.8000 |
| Scaf_813  | d.1     | Gypsy-14_SMo-I  | 0.7971 |
|           |         | Gypsy-134_ZM-I  | 0.7627 |
| Scaf_1430 | u.1     | -               | -      |
|           | d (R)   | SINE_AFC        | 0.8810 |
| Scaf_1626 | u (R)   | -               | -      |
|           | d       | CHAPLIN4_FR     | 0.7333 |
|           | u       | CR1-31_DR       | 0.8939 |
