# Supplementary material for: Evolutionary dynamics of rRNA gene clusters in cichlid fish
Source: PubMed Central journal article supplement (PMC3503869; doi:10.1186/1471-2148-12-198), 2012-10-05
Supplement: 1471-2148-12-198-S7.pdf [file 1471-2148-12-198-S7.pdf]

**Additional file 7:** Identified transposable elements (TEs) in the flanking regions (FRs) of 18S rRNA gene copies retrieved from the *O. niloticus* genome and their similarity (%) level to sequences deposited in Repbase. The position of the TE is indicated by “d” - downstream of the gene or “u” - upstream of the gene. d1, d2..., u1, u2... indicate the different copies detected. R indicates reverse copies of the TE.

| <b>Scaffolds</b> | <b>FR</b>   | <b>TEs</b>      | <b>Similarity (%)</b> |
|------------------|-------------|-----------------|-----------------------|
| Scaf_1           | d.1         | Kiri-13_AAe     | 0.7333                |
|                  |             | hAT-N9_SBi      | 0.7603                |
|                  | u.1         | Dong_FR2        | 0.8288                |
|                  |             | ATCOPIA8BI      | 0.8200                |
|                  |             | Tc1-9_Xt        | 0.7794                |
|                  | d.2         | SINE2-1 AFC     | 0.8455                |
|                  | u.2         | Copia-75_SB-I   | 0.8103                |
|                  |             | Transib-3_HM    | 0.7963                |
|                  | Scaf_6      | d               | -                     |
| u                |             | SINE2-1 AFC     | 0.8819                |
| Scaf_8           | d           | Gypsy-26-I_DR   | 0.7179                |
|                  |             | Gypsy-137_GM-I  | 0.7917                |
|                  |             | Gypsy-172_AA-I  | 0.8611                |
|                  | u           | -               | -                     |
| Scaf_13          | d.1 (R)     | Copia25-PTR_I   | 0.7258                |
|                  | u.1 (R)     | piggyback-N3_DR | 0.8182                |
|                  | d.2 (R)     | piggyback-N3_DR | 0.8222                |
|                  | u.2 (R)     | -               | -                     |
|                  | d.3 (R)     | piggyback-N3_DR | 0.8222                |
|                  | u.3 (R)     | -               | -                     |
|                  | d.4 (R)     | DNA-8-3_DR      | 0.7634                |
|                  |             | SINE2-1 AFC     | 0.7500                |
|                  | u.4 (R)     | GYPSY68-I_AG    | 0.8182                |
|                  | Scaf_19     | d.1 (R)         | MAUI                  |
| u.1 (R)          |             | REX1-1_AFC      | 0.9028                |
|                  |             | DNA-8-1_HM      | 0.8333                |
|                  |             | DNA-8-1_HM      | 0.8333                |
| d.2 (R)          |             | REX1-1_AFC      | 0.9028                |
|                  |             | DNA-8-1_HM      | 0.8333                |
|                  |             | DNA-X-7_DR      | 0.7150                |
| u.2 (R)          |             | DNA-5-6_DR      | 0.8022                |
|                  |             | EnSpm-6N1_DR    | 0.7528                |
|                  |             | ERV2-9_Pca-I    | 0.7872                |
|                  |             | L2-2_Lme        | 0.9722                |
|                  |             | L2-1_FR1        | 0.8333                |
| d.3 (R)          |             | TE-X-4_DR       | 0.8511                |
| u.3 (R)          | Charlie3_Xt | 0.8684          |                       |
|                  | MAUI        | 0.7289          |                       |

|          |       |                  |        |
|----------|-------|------------------|--------|
|          |       | MAUI             | 0.8302 |
| Scaf_38  | d     | REX1-4_AFC       | 0.7812 |
|          | u     | ERV3-1-I_XT      | 0.7759 |
|          |       | Helitron-N10_NV  | 0.8511 |
|          |       | Gypsy-40_Stu-LTR | 0.7945 |
| Scaf_40  | d (R) | -                | -      |
|          | u (R) | SINE_FR2         | 0.7964 |
| Scaf_44  | d (R) | L2-8_DR          | 0.7959 |
|          |       | Chester-1        | 0.7538 |
|          | u (R) | hAT-1_SP         | 0.8250 |
|          |       | TZF28B           | 0.8010 |
|          |       | Tc1-1_DR         | 0.9221 |
| Scaf_58  | d (R) | L1PA10           | 0.7531 |
|          | u (R) | -                | -      |
| Scaf_61  | d     | TC1_FR3          | 0.7449 |
|          |       | SINE_FR2         | 0.7934 |
|          |       | DIRS-1D-LTR_DR   | 0.7500 |
|          | u     | DNA-8-8 DR       | 0.7407 |
|          |       | EnSpm-8_HM       | 0.8000 |
|          |       | Chap8_Xt         | 0.7121 |
| Scaf_86  | d (R) | TART_DV          | 0.8113 |
|          | u (R) | MAUI             | 0.7164 |
| Scaf_104 | u     | L1-2_Dor         | 0.8367 |
|          |       | CR1-21_NV        | 0.7500 |
|          |       | TRE3D            | 0.7692 |
|          | d     | -                | -      |
| Scaf_114 | d (R) | JODY_HC_LTR      | 0.7692 |
|          |       | Tc1-2_Xt         | 0.7518 |
|          |       | MARINER_2_DR     | 0.7600 |
|          |       | SINE2-1 AFC      | 0.8214 |
|          |       | SINE2-1 AFC      | 0.8596 |
|          | u (R) | Mariner-1_DR     | 0.7009 |
| Scaf_118 | d     | ENSPM-6_ZM       | 0.7639 |
|          |       | Polinton-8_NVi   | 0.7800 |
|          |       | RTE-1_AFC        | 0.7818 |
|          |       | piggyback-4_BF   | 0.7193 |
|          | u     | SINE2-1_AFC      | 0.7851 |
| Scaf_136 | d     | Tc1-5_Xt         | 0.7305 |
|          |       | Tc1-5_Xt         | 0.7143 |
|          |       | Tc1-5_Xt         | 0.7231 |
|          | u     | Gypsy-614_AA-I   | 0.7857 |
|          |       | SINE_TE          | 0.7925 |
| Scaf_143 | d (R) | Harbinger-       | 0.7600 |
|          | u (R) | N20_NV           | 0.8261 |
|          |       | L1-3_SSc         | 0.8611 |

|          |         |                |        |
|----------|---------|----------------|--------|
|          |         | GmGYPSY11_I    | 0.8367 |
|          |         | CHAPLIN1_FR    | 0.7917 |
|          |         | Jockey-14_DAn  |        |
| Scaf_169 | d       | MAUI           | 0.7238 |
|          |         | L2-1_DR        | 0.7432 |
|          |         | CR1-82_AAe     | 0.7736 |
|          | u       | DNA-1-3_DR     | 0.7677 |
|          |         | CR-74_HM       | 0.8500 |
|          |         | L2-41_DRe      | 0.7398 |
| Scaf_181 | d(R)    | SINE2-1 AFC    | 0.8049 |
|          |         | SINE2-1 AFC    | 0.7204 |
|          |         | RR55           | 0.7188 |
|          | u(R)    | SINE_FR2       | 0.8097 |
|          |         | SINE_TE        | 0.8605 |
| Scaf_182 | d       | DNA-8-25_DR    | 0.7561 |
|          |         | Copia-39_Pru-I | 0.7778 |
|          | u       | SINE2-1 AFC    | 0.8182 |
| Scaf_185 | d       | Mariner-35_HM  | 0.7419 |
|          |         | MAUI           | 0.7412 |
|          |         | Expander       | 0.7368 |
|          | u       | RTE-1_AFC      | 0.7176 |
|          |         | Sat-1_TSy      | 0.7778 |
| Scaf_197 | d       | MAUI           | 0.7500 |
|          |         | SINE_FR2       | 0.8174 |
|          | u       | MAUI           | 0.7394 |
|          |         | L2-1_DR        | 0.7361 |
| Scaf_201 | d (R)   | Tc1-1_DR       | 0.8000 |
|          | u (R)   | Tc1-1_Xt       | 0.7562 |
| Scaf_214 | d       | Tc1-1_FR1      | 0.7320 |
|          |         | MAUI           | 0.7797 |
|          | u       | SINE2-1_AFC    | 0.8245 |
|          |         | Tc1_FR1        | 0.8256 |
|          |         | Tc1_FR1        | 0.8571 |
| Scaf_245 | d       | Swimmer        | 0.8000 |
|          | u       | -              | -      |
| Scaf_250 | d (R)   | CHAPLIN3_FR    | 0.8125 |
|          |         | hAT-2_Xt       | 0.8036 |
|          |         | SINE2-1_AFC    | 0.8819 |
|          | u (R)   | Kiri_14_AAe    | 0.8649 |
|          |         | DONG_FR2       | 0.8626 |
| Scaf_515 | d (R)   | DNA-3-5_DR     | 0.7667 |
|          |         | L2-41_DRe      | 0.7031 |
|          |         | BRIDGE1_TN     | 0.9143 |
|          | u (R)   | -              | -      |
| Scaf_516 | d.2 (R) | -              | -      |
|          | u.2 (R) | REX1-5_XT      | 0.7143 |

|           |       |               |        |
|-----------|-------|---------------|--------|
| Scaf_834  | d     | Gypsy-11_RP-I | 0.8491 |
|           | u     | REX1-2_AFC    | 0.8868 |
| Scaf_1005 | d (R) | -             | -      |
|           | u (R) | SINE_AFC      | 0.9606 |
|           |       | -             | -      |

---
